# Supplementary material for: Synthetic azobenzene-containing metal–organic framework ion channels toward efficient light-gated ion transport at the subnanoscale
Source: Royal Society of Chemistry journal article supplement (doi:10.1039/d1nr04595d), 2021-01-01
Supplement: d1nr04595d1.pdf [file d1nr04595d1.pdf]

## Supporting Information

### Synthetic Azobenzene-Containing Metal-Organic Framework Ion Channels Toward Efficient Light-Gated Ion transport at the Subnanoscale

Tianyue Qian,<sup>a</sup> Chen Zhao,<sup>b</sup> Ruoxin Wang,<sup>a</sup> Xiaofang Chen,<sup>a</sup> Jue Hou,<sup>c</sup> Huanting Wang\*<sup>a</sup> and Huacheng Zhang\*<sup>b</sup>

a. Department of Chemical Engineering, Monash University, Clayton, Victoria 3800, Australia. Email: [huanting.wang@monash.edu](mailto:huanting.wang@monash.edu)

b. Chemical and Environmental Engineering, School of Engineering, RMIT University, Melbourne, Victoria 3000, Australia. Email: [huacheng.zhang@rmit.edu.au](mailto:huacheng.zhang@rmit.edu.au).

c. Manufacturing, CSIRO, Clayton, Victoria 3168, Australia.

## 1. Supplementary Figures

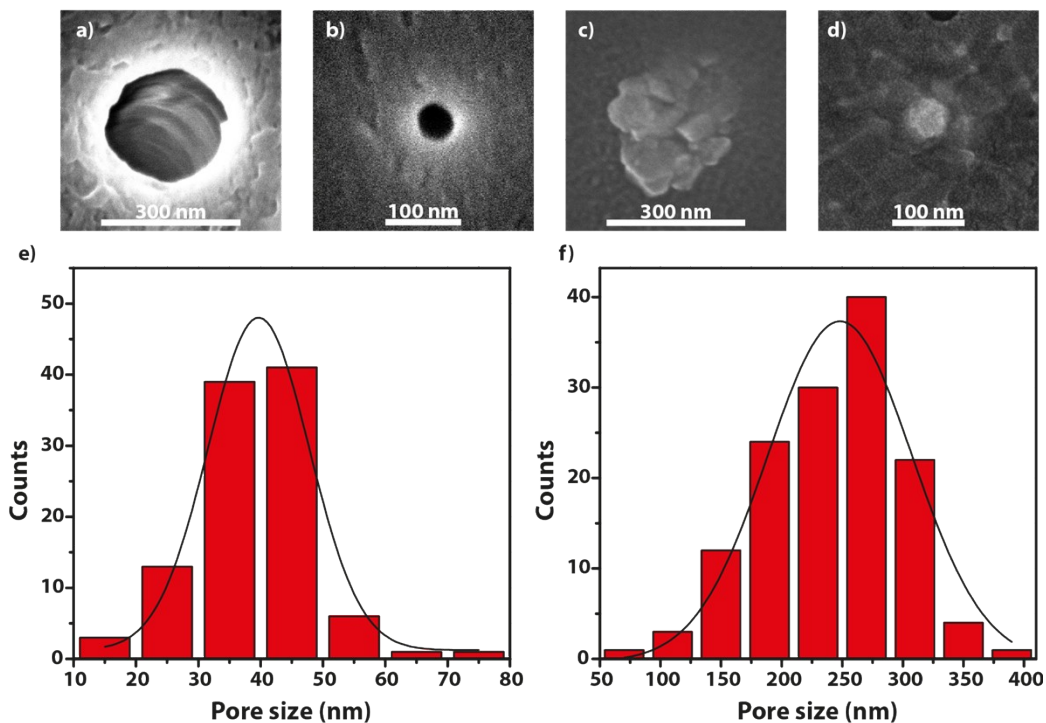

Figure S1. Structural characterization of bullet-shaped nanochannels. (a, b) SEM image of the (a) base side and (b) the tip side of PET nanochannel with a scale bar of 300 and 100 nm. (c, d) SEM image of (c) the base side and (d) the tip side of PET-UiO-66 nanochannel, with a scale bar of 300 and 100 nm. (e) Tip radius distribution, which has an average value of  $39\pm 9$  nm. (f) Base radius distribution, which has an average value of  $242\pm 56$  nm.

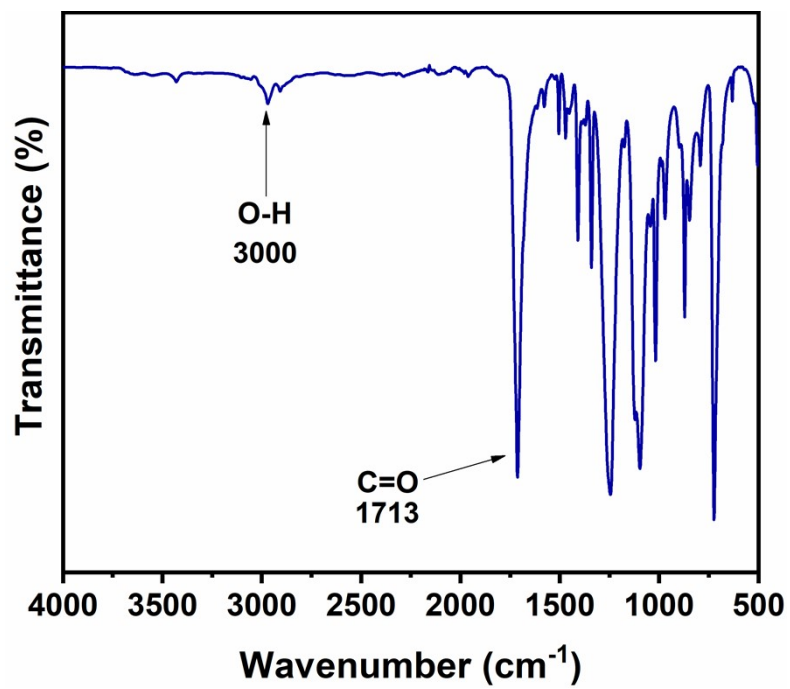

Figure S2. FTIR spectrum of the PET nanochannel membrane.

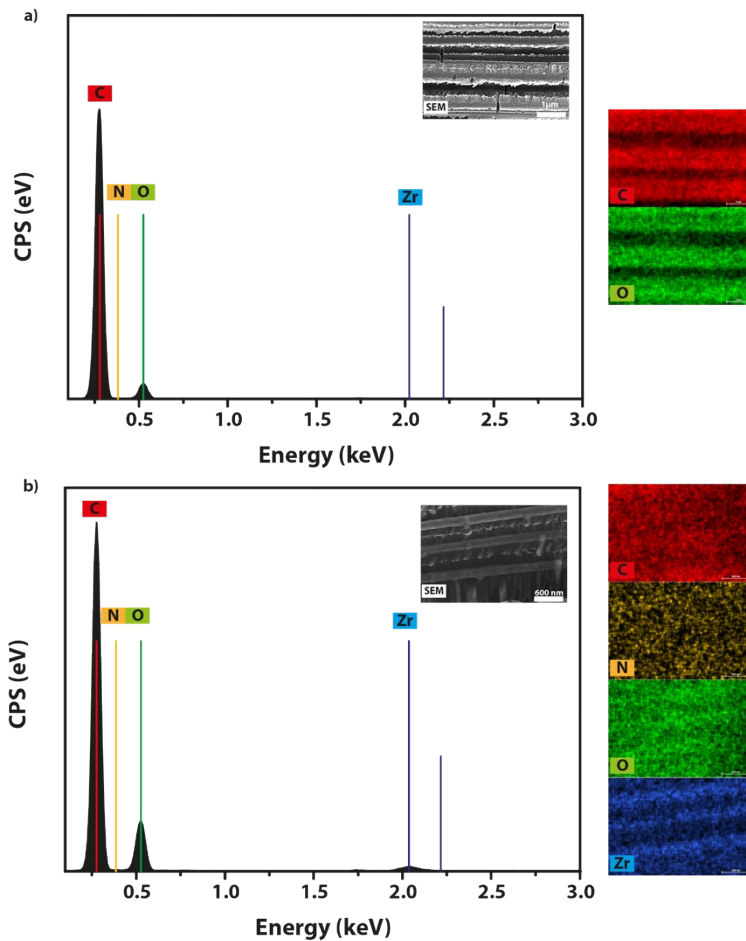

Figure S3. Characterization of the nanochannels. (a) EDX spectrum of a multiple nanochannel PET membrane (with a pore density of  $10^8 \text{ cm}^{-2}$ ) with the insets of an SEM cross-sectional image of the PET multi-nanochannel membrane, and the EDX carbon (C, red) and oxygen (O, green) mappings; the scale bars are  $1 \mu\text{m}$ . (c) EDX spectrum of a PET-UiO-66 nanochannel membrane (with a pore density of  $10^8 \text{ cm}^{-2}$ ) with the insets of an SEM cross-sectional image of the middle part of the PET multi-nanochannel membrane, and the EDX carbon (C, red), nitrogen (N, yellow), oxygen (O, green), zirconium (Zr, blue) mappings along the cross section of the membrane; the scale bars are  $600 \text{ nm}$ .

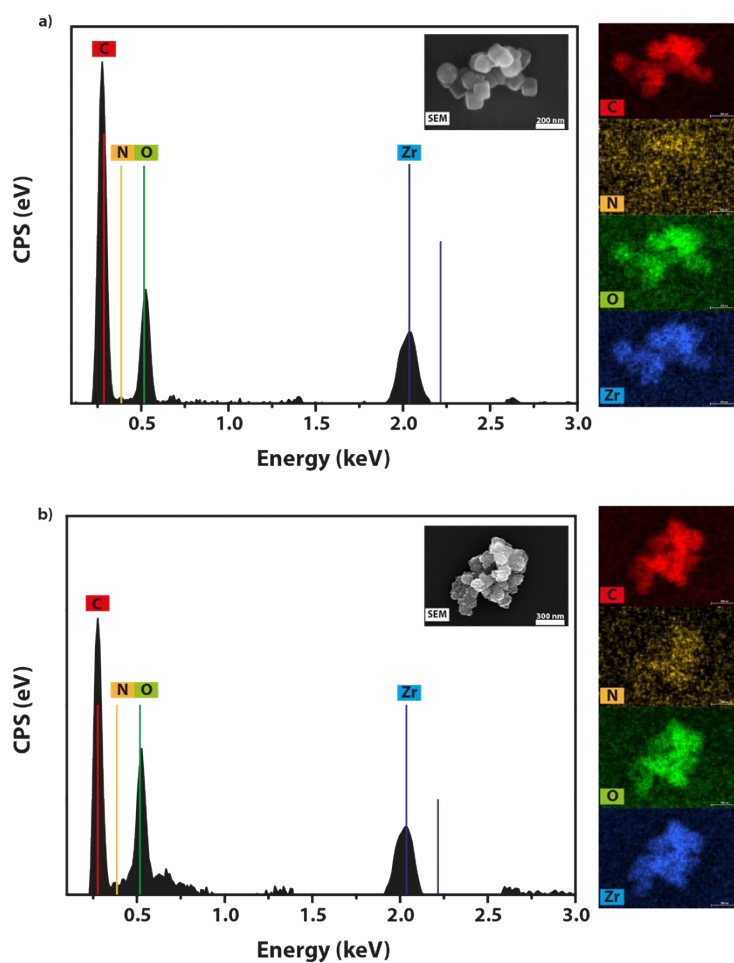

Figure S4. Characterization of MOF particles. (a) EDX spectrum of UiO-66 crystals along with the insets of an SEM cross-sectional image of the PET multi-nanochannel membrane, and the EDX carbon (C, red), nitrogen (N, yellow), oxygen (O, green), zirconium (Zr, blue) mappings along the cross section of the membrane; the scale bars are 200 nm. (b) EDX spectrum of a UiO-66-AZODC-2:1 crystal with the insets of an SEM cross-sectional image of the PET multi-nanochannel membrane, and the EDX carbon (C, red), nitrogen (N, yellow), oxygen (O, green), zirconium (Zr, blue) mappings; the scale bars are 300nm.

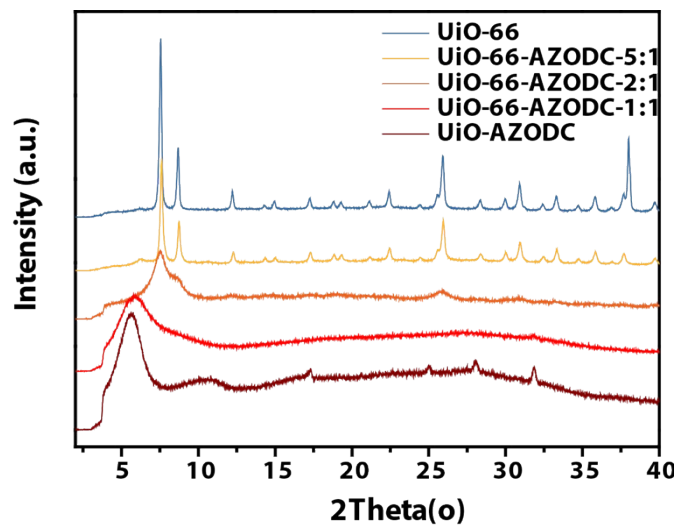

Figure S5. Powder X-ray diffraction (PXRD) patterns of UiO-66 crystals, UiO-66-AZODC mixed ligand MOFs and UiO-AZODC crystals.

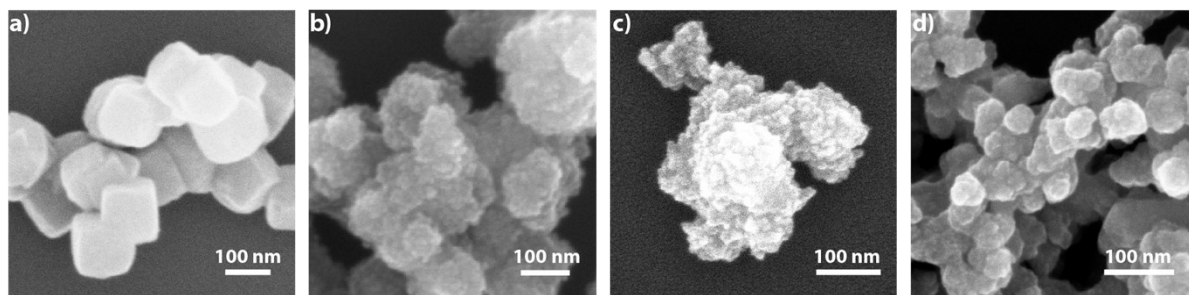

Figure S6. SEM image of MOF particles. (a) SEM image UiO-66 particles. (b,c) SEM image of the mixed-ligand UiO-66-AZODC MOF particles with different ratios of ligands added. The ratio of BDC ligands to AZODC ligands are (b) 2:1 and (c) 1:1, respectively. (d) SEM image UiO-AZODC MOF particles.

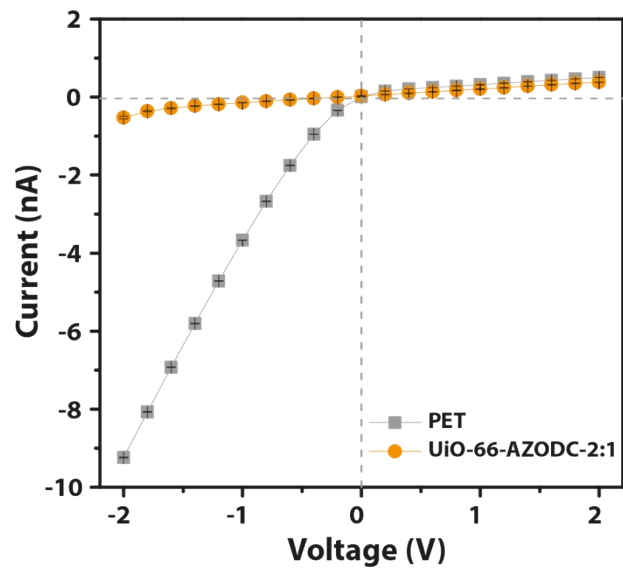

Figure S7. Ion transport properties. I-V curves of the PET nanochannels before and after the in-situ growth of UiO-66-AZODC.



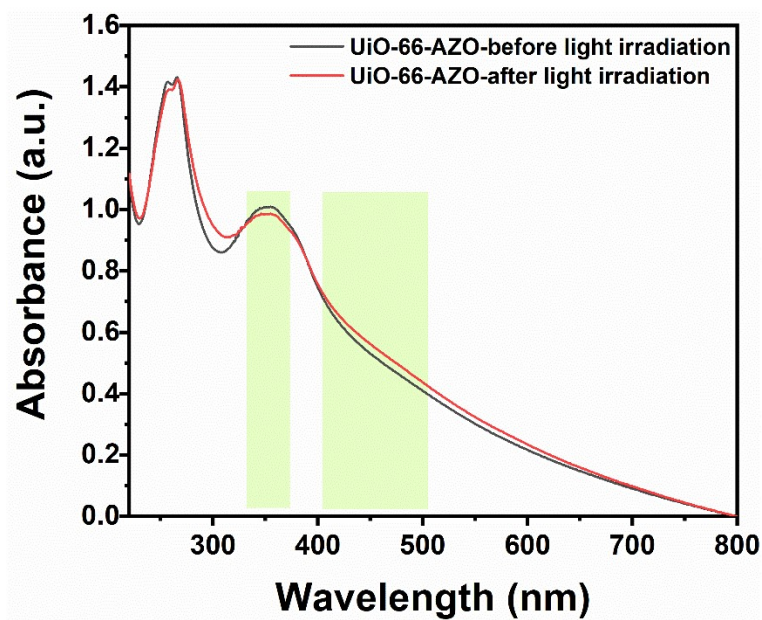

Figure S8. The UV-Vis spectra of UiO-66-AZODC-2:1 MOF powders before and after UV light (365 nm) irradiation in water

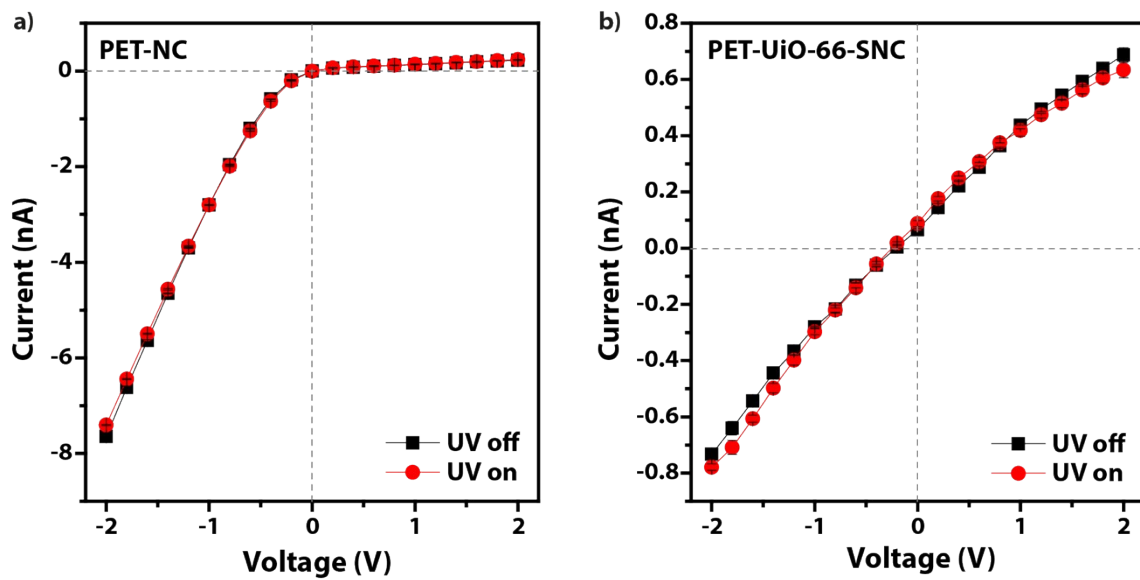

Figure S9. Ion transport properties of the reference sample. I-V curves of the PET-NC and UiO-66 SNC with UV light off and on.

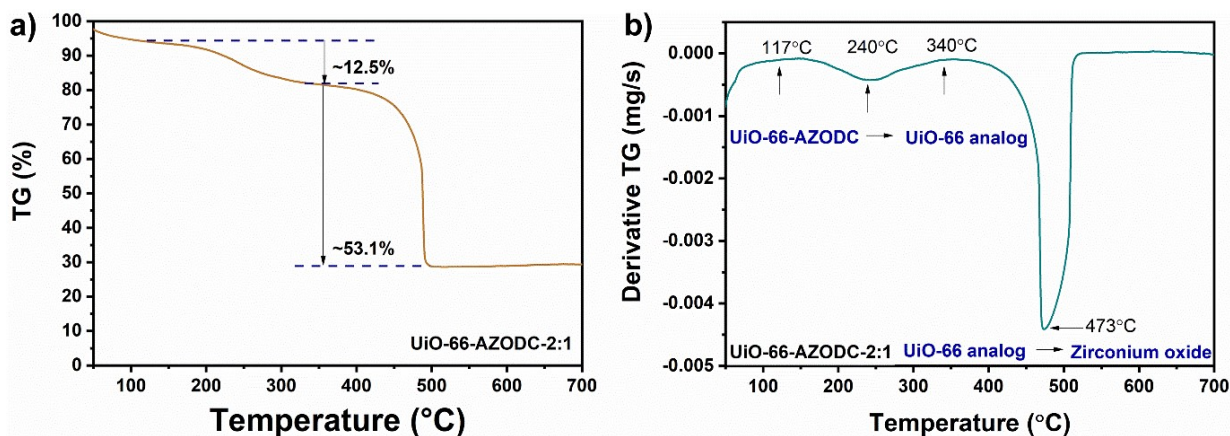

Figure S10. TG (a) and derivative TG (b) curves of UiO-66-AZODC-2:1.

As shown in the above figure, based on the melting point differences (AZODC > 117°C, BDC > 300°C), the combustion of UiO-66-AZODC-2:1 includes the evaporation of water/solvent molecules at the initial period (before 117°C), the degradation of AZODC (117°C~340°C, peak at 240°C), the oxidation of BDC and the final transformation into zirconium oxide (>340°C, peak at 473°C). Therefore, the weight loss of ~12.5% is attributed to AZODC mass fraction, and its molar ratio can be calculated using the following equation:

the molar ratio of AZODC = AZODC mole number/UiO-66-AZODC mole number =  
 (AZODC mass fraction/AZODC molecular weight)/(UiO-66-AZODC mass fraction/UiO-66-AZODC molecular weight),

where the AZODC mass fraction = 12.5%, AZODC Mw = 270.24 g/mol, UiO-66-AZODC mass = 100%, UiO-66-AZODC unit coordinated with one molecule of AZODC ( $Zr_6C_{60}H_{38}O_{33}N_2$ ), Mw = 1862.28 g/mol. Please note that this molecular formula is in an ideal condition, but in a real case, for MOFs with defects, the formula would be different.

The calculated molar ratio of AZODC is about 0.86. This means that one MOF unit shares ~0.86 AZODC molecule, which is close to the above suggested one-AZODC coordinated MOF molecular structure.

## 2. Supplementary Tables

Table S1. Examples of on-off ratio in AZO-based light-gated nanochannels or subnanochannels

| On-off ratio | Materials                              | Target compound(s)         | Reference |
|--------------|----------------------------------------|----------------------------|-----------|
| 4.8          | Zeolite-AZO membrane                   | Gas                        | 1         |
| 1.3          | AZO-protein voltage-gated channel      | K <sup>+</sup> ion         | 2         |
| 2.1          | AZO modified protein channel           | Ions                       | 3         |
| 5            | AZO-P6A host-guest nanochannel         | K <sup>+</sup> ion         | 4         |
| 3.3          | AZO-PDDA nanochannel                   | Ions                       | 5         |
| 1.3          | AZO-UiO-66 PIM-1 mixed-matrix membrane | Gas                        | 6         |
| 16.7         | AZO-dimeric complex membrane           | Cl <sup>-</sup> ion        | 7         |
| 17.8         | AZO-confined subnanochannel            | UiO-66 Li <sup>+</sup> ion | 8         |
| 40.2         | UiO-66-AZODC subnanochannel            | Li <sup>+</sup> ion        | This work |

Table S2. EDX results of MOF crystals

(a) EDX results of UiO-66 crystals

| Element   | Mass Norm. [%] | Atom [%] | Abs. error [%]<br>(1 sigma) | Rel. error [%]<br>(1 sigma) |
|-----------|----------------|----------|-----------------------------|-----------------------------|
| Carbon    | 43.13          | 71.47    | 0.93                        | 12.58                       |
| Oxygen    | 13.89          | 17.28    | 0.35                        | 14.73                       |
| Zirconium | 41.43          | 9.04     | 0.29                        | 4.10                        |
| Nitrogen  | 1.55           | 2.21     | 0.10                        | 36.20                       |

(b) EDX results of UiO-66-AZODC-2:1 crystals

| Element   | Mass Norm. [%] | Atom [%] | Abs. error [%]<br>(1 sigma) | Rel. error [%]<br>(1 sigma) |
|-----------|----------------|----------|-----------------------------|-----------------------------|
| Carbon    | 33.37          | 61.95    | 0.66                        | 13.82                       |
| Oxygen    | 15.22          | 21.22    | 0.34                        | 15.45                       |
| Zirconium | 48.25          | 11.80    | 0.28                        | 4.12                        |
| Nitrogen  | 3.16           | 5.03     | 0.13                        | 29.55                       |

According to the N contents by EDX results, it can be concluded that the N content originated from AZODC is about **1.61%** (obtained by 3.16%-1.55%). Then, we calculated the N contents from the above hypothesized one AZODC coordinated with one cavity of UiO-66, using the following equation:

$$\text{N content} = \text{N mass/UiO-66-AZODC mass} \times 100\% =$$

$$(14.01 \text{ g/mol} \times \text{mole number}) / (1862.28 \text{ g/mol} \times \text{mole number}) \times 100\%$$

The molar ratio between N and UiO-66-AZODC unit is 2:1, then the final N content in the UiO-66-AZODC unit is calculated to be 1.5%. This calculated result is very close to the EDX result of **1.61%**, indicating that the UiO-66-AZODC mostly consists of UiO-66 with one AZODC. Please note that EDX offers element content of a limited region of the sample instead of expressing the elementary compositions of the whole sample, this may be the reason that causes the differences.

## References

1. K. Weh, M. Noack, K. Hoffmann, K. P. Schroder and J. Caro, *Microporous Mesoporous Mater.*, 2002, 54, 15-26.
2. A. Mourot, M. A. Kienzler, M. R. Banghart, T. Fehrentz, F. M. Huber, M. Stein, R. H. Kramer and D. Trauner, *ACS Chem. Neurosci.*, 2011, 2, 536-543.
3. A. Rullo, A. Reiner, A. Reiter, D. Trauner, E. Isacoff and G. Woolley, *Chem. Commun.*, 2014, 50, 14613-14615.
4. Y. Sun, J. Ma, F. Zhang, F. Zhu, Y. Mei, L. Liu, D. Tian and H. Li, *Nat. Commun.*, 2017, 8, 260.
5. K. Y. Chun, Y. J. Son, S. Jo and C. S. Han, *Small*, 2018, 14, 1703618.
6. N. Prasetya and B. P. Ladewig, *J. Mater. Chem. A*, 2019, 7, 15164-15172.
7. M. Ahmad, S. Metya, A. Das and P. Talukdar, *Chem. Eur. J.*, 2020, 26, 8703-8708.
8. T. Qian, H. Zhang, X. Li, J. Hou, C. Zhao, Q. Gu and H. Wang, *Angew. Chem. Int. Ed.*, 2020, 59, 13051-13056.
